# Supplementary figures and images for: Functionalized 3D polyurethane foams with microwave-synthesized TiO2 nanostructures for solar light-driven degradation of tetracycline
Source: Royal Society of Chemistry journal article supplement (doi:10.1039/d4va00110a), 2025-01-01

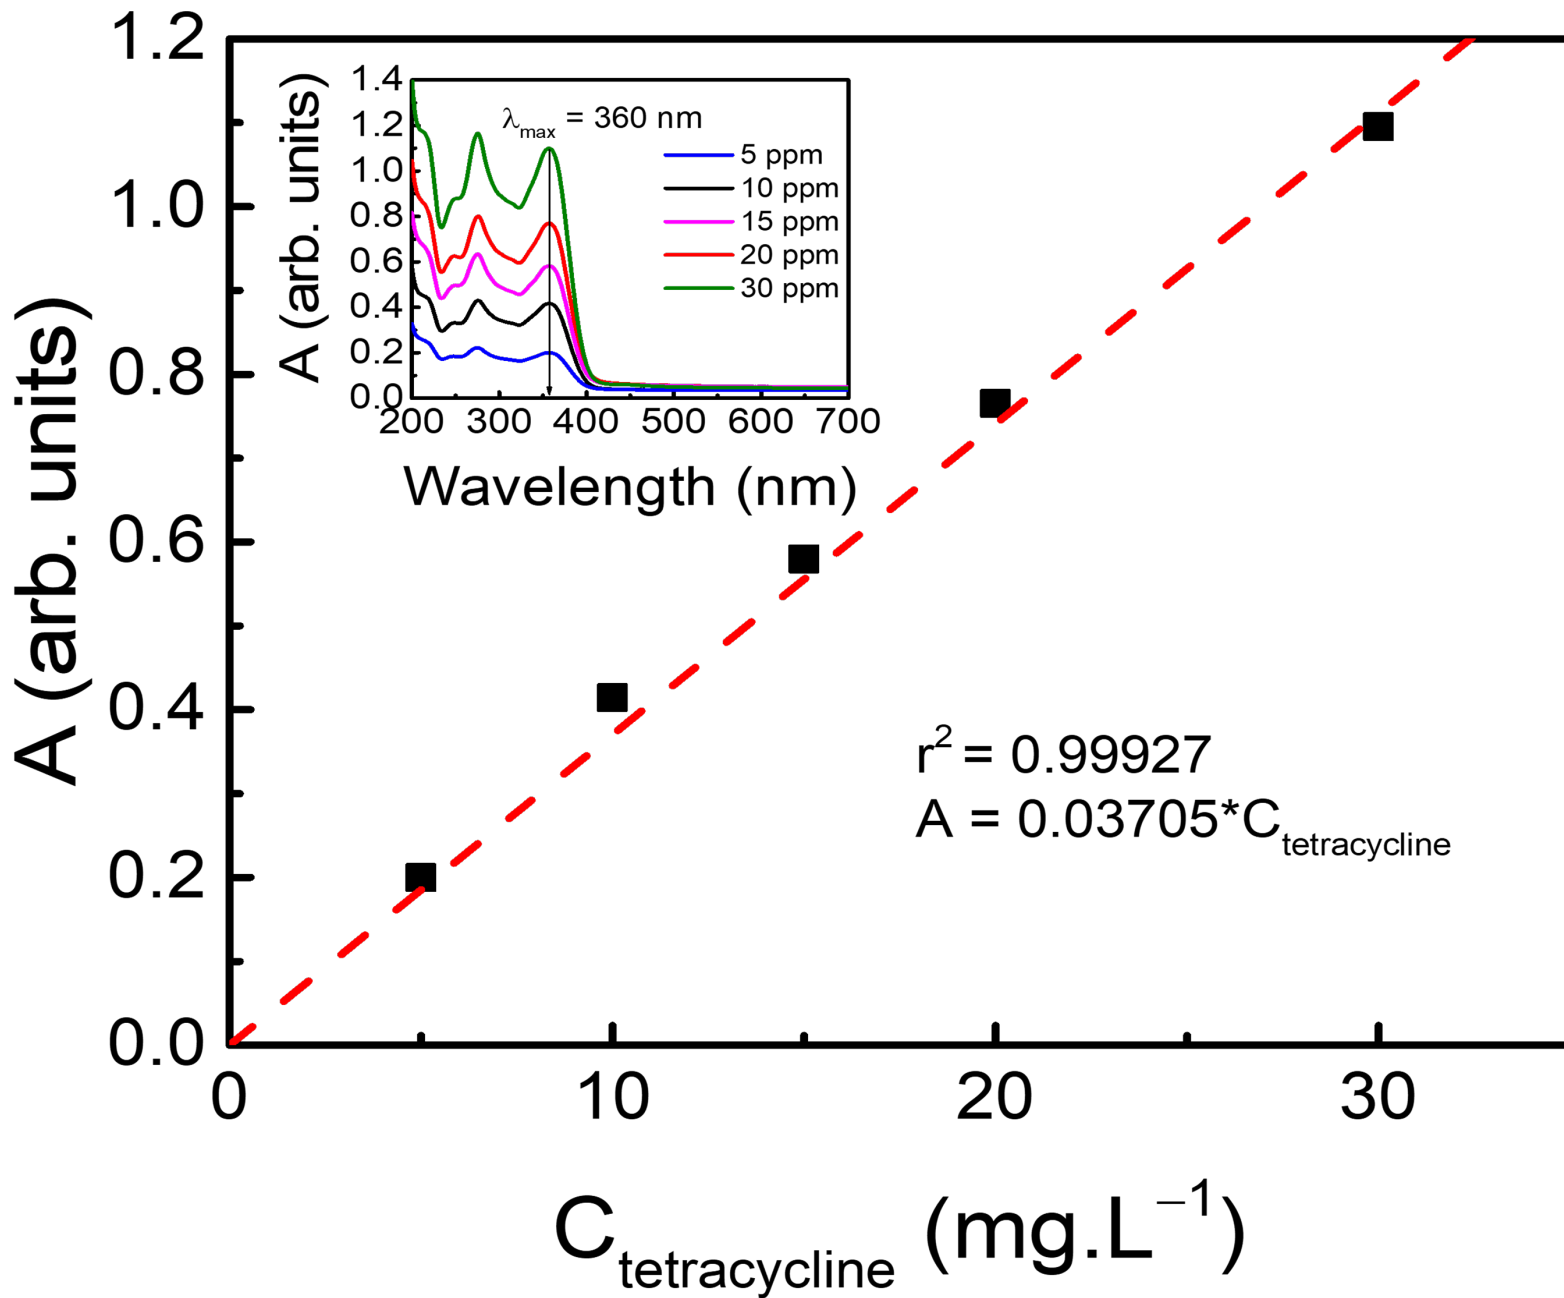

Supplement: d4va00110a1.pdf [file d4va00110a1.pdf]

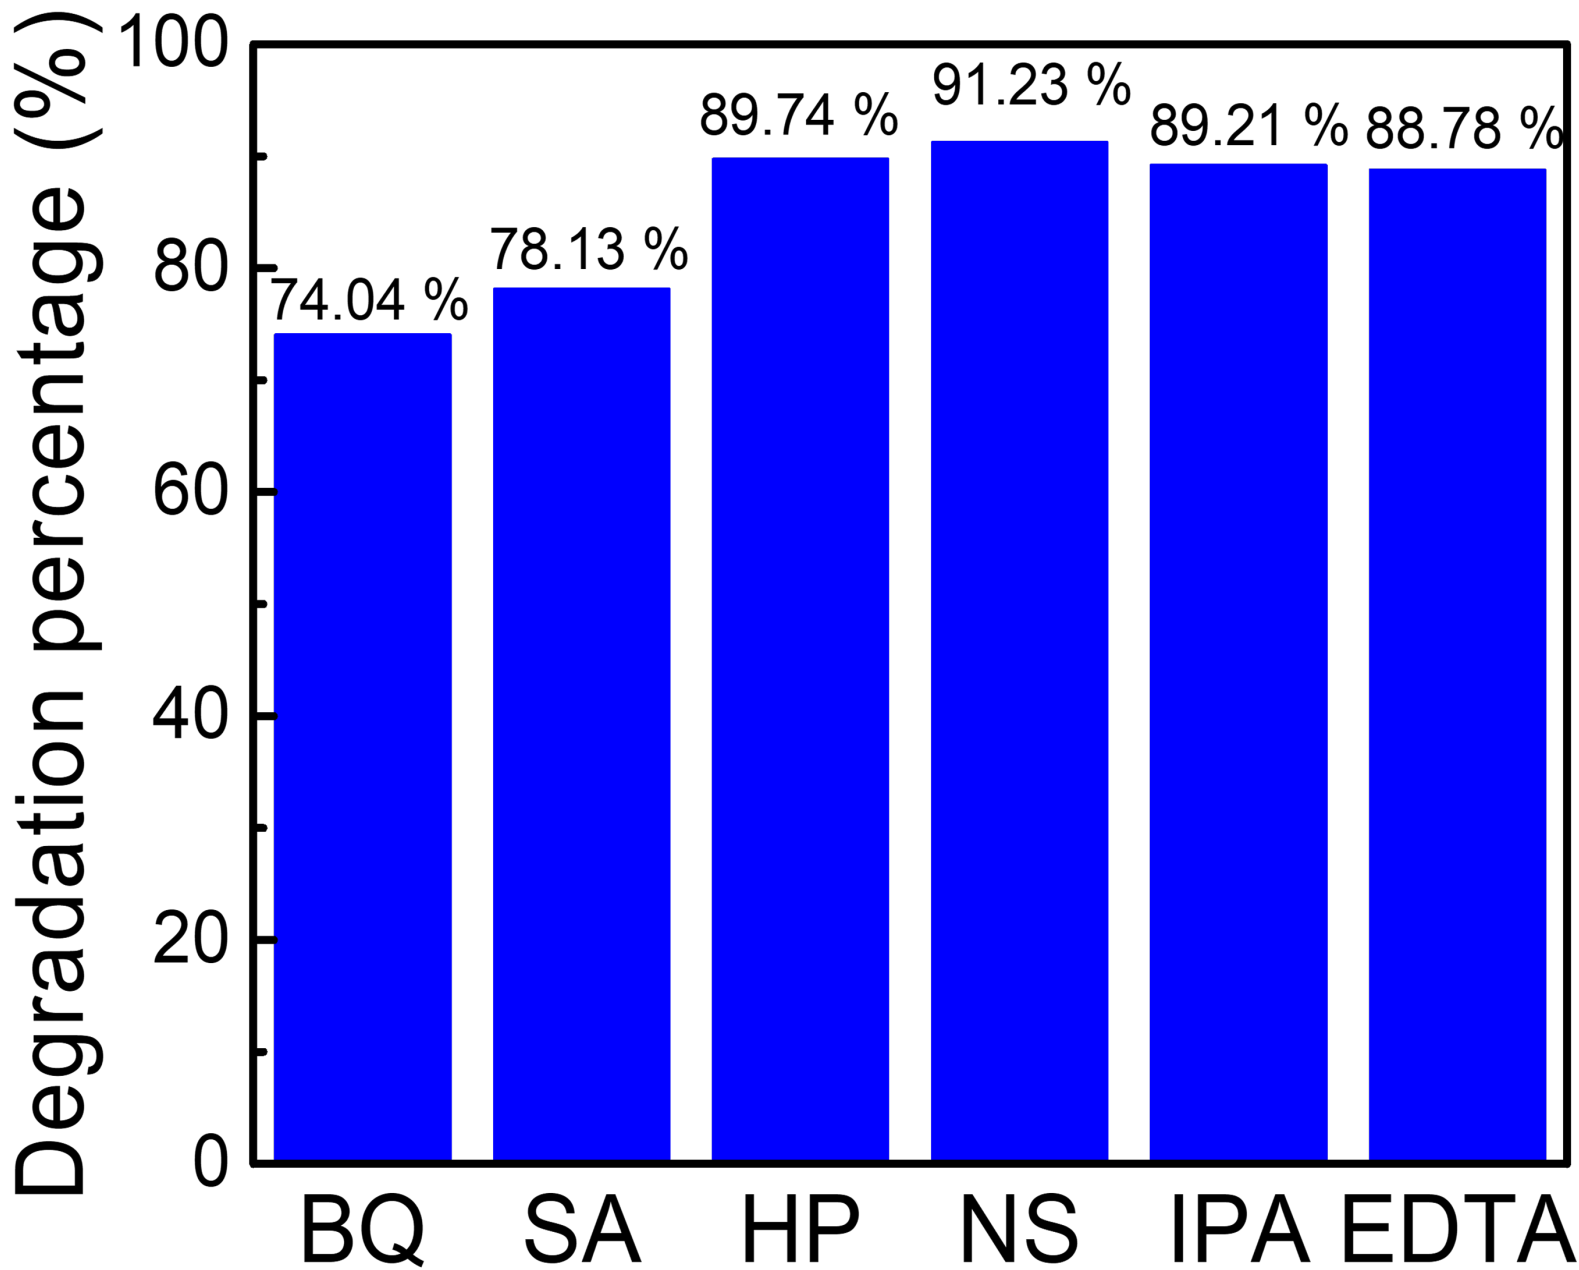

Supplement: d4va00110a10.pdf [file d4va00110a10.pdf]

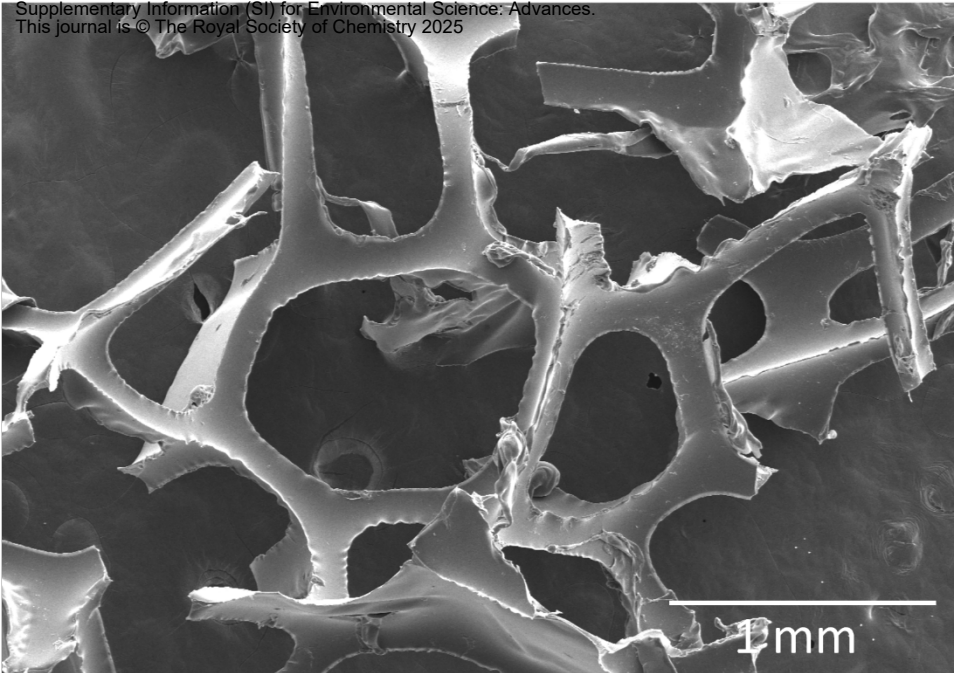

Supplement: d4va00110a2.pdf [file d4va00110a2.pdf]

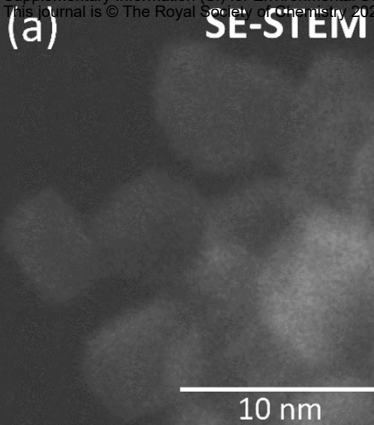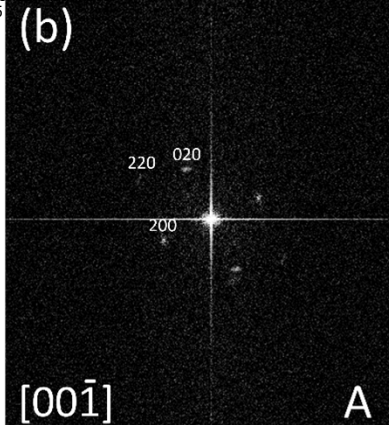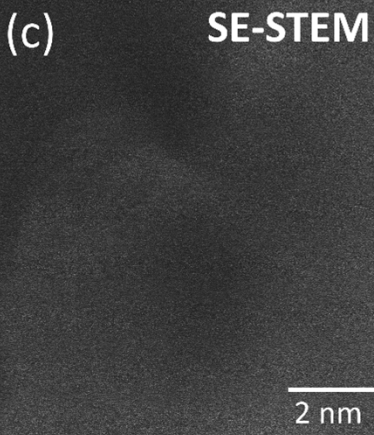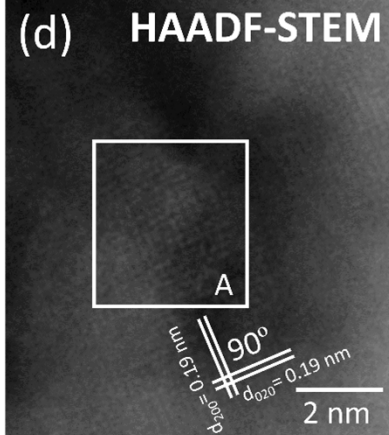

Supplement: d4va00110a3.pdf [file d4va00110a3.pdf]

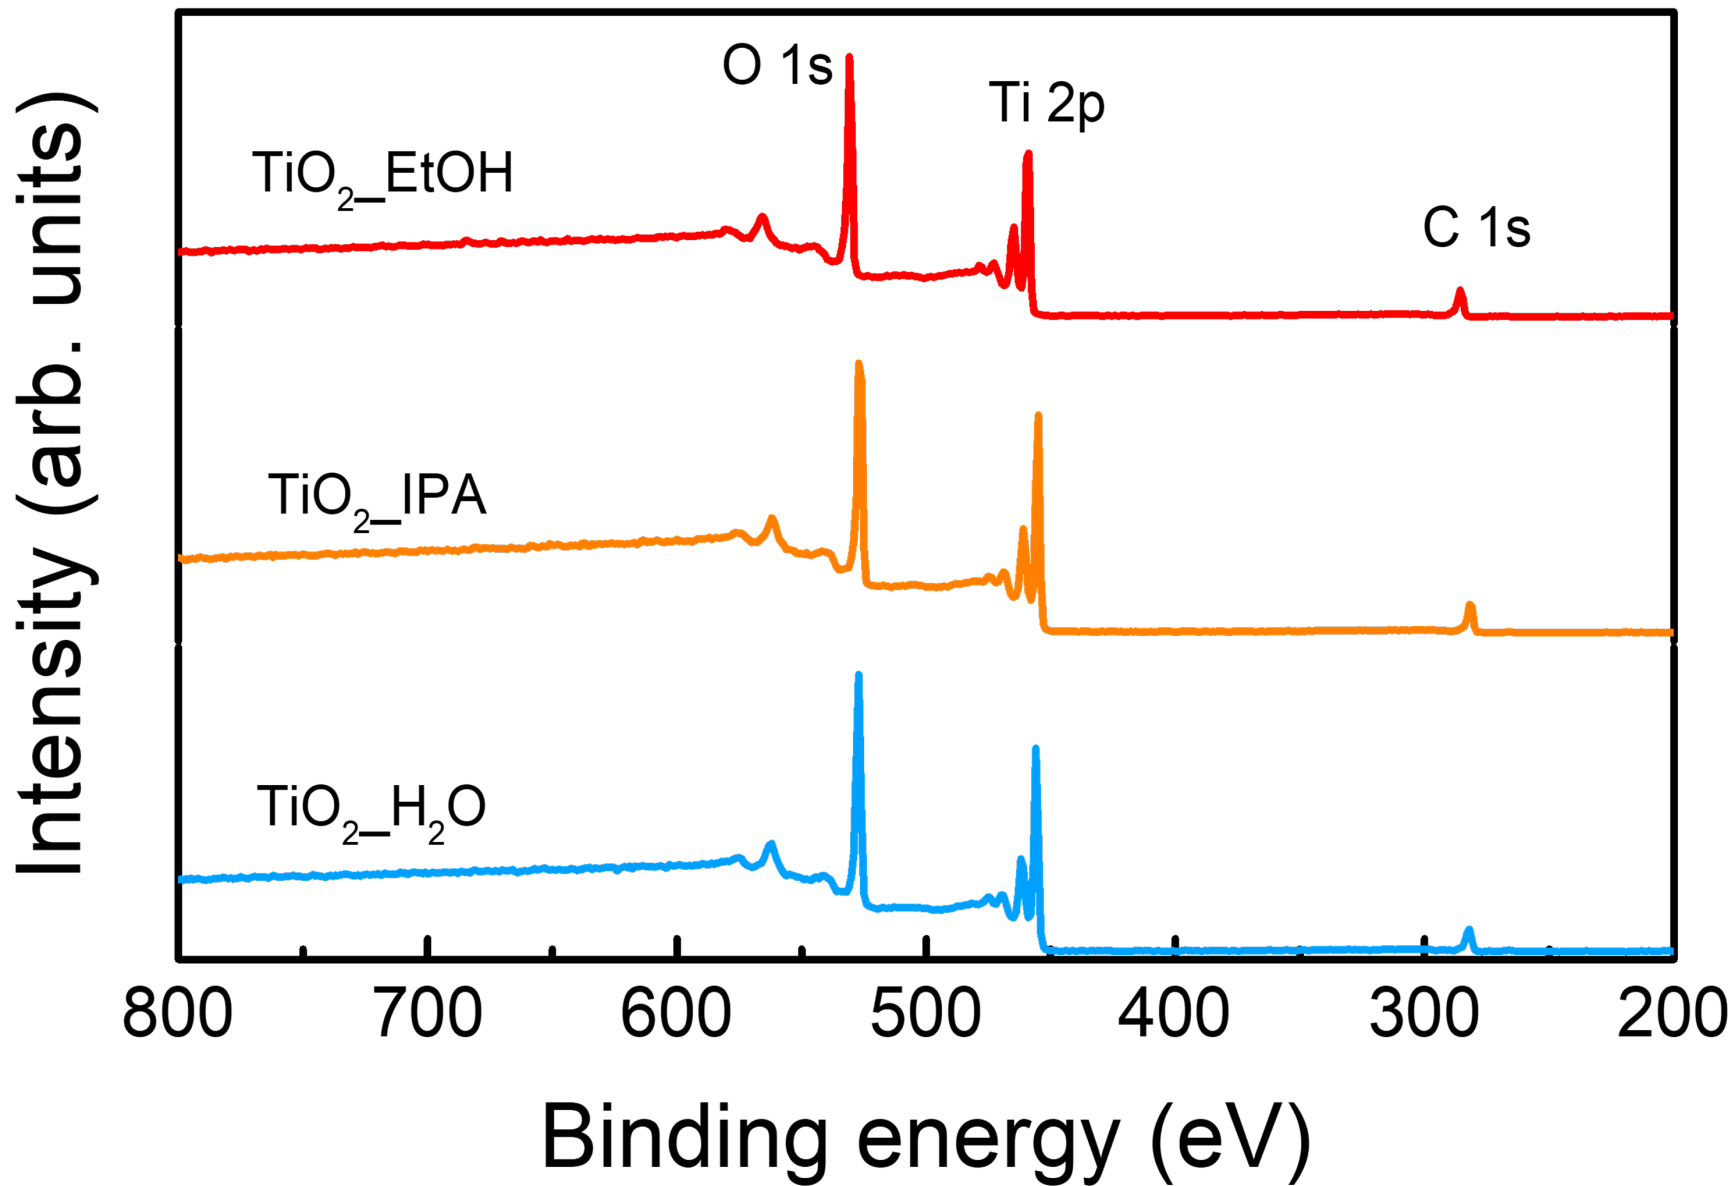

Supplement: d4va00110a4.pdf [file d4va00110a4.pdf]

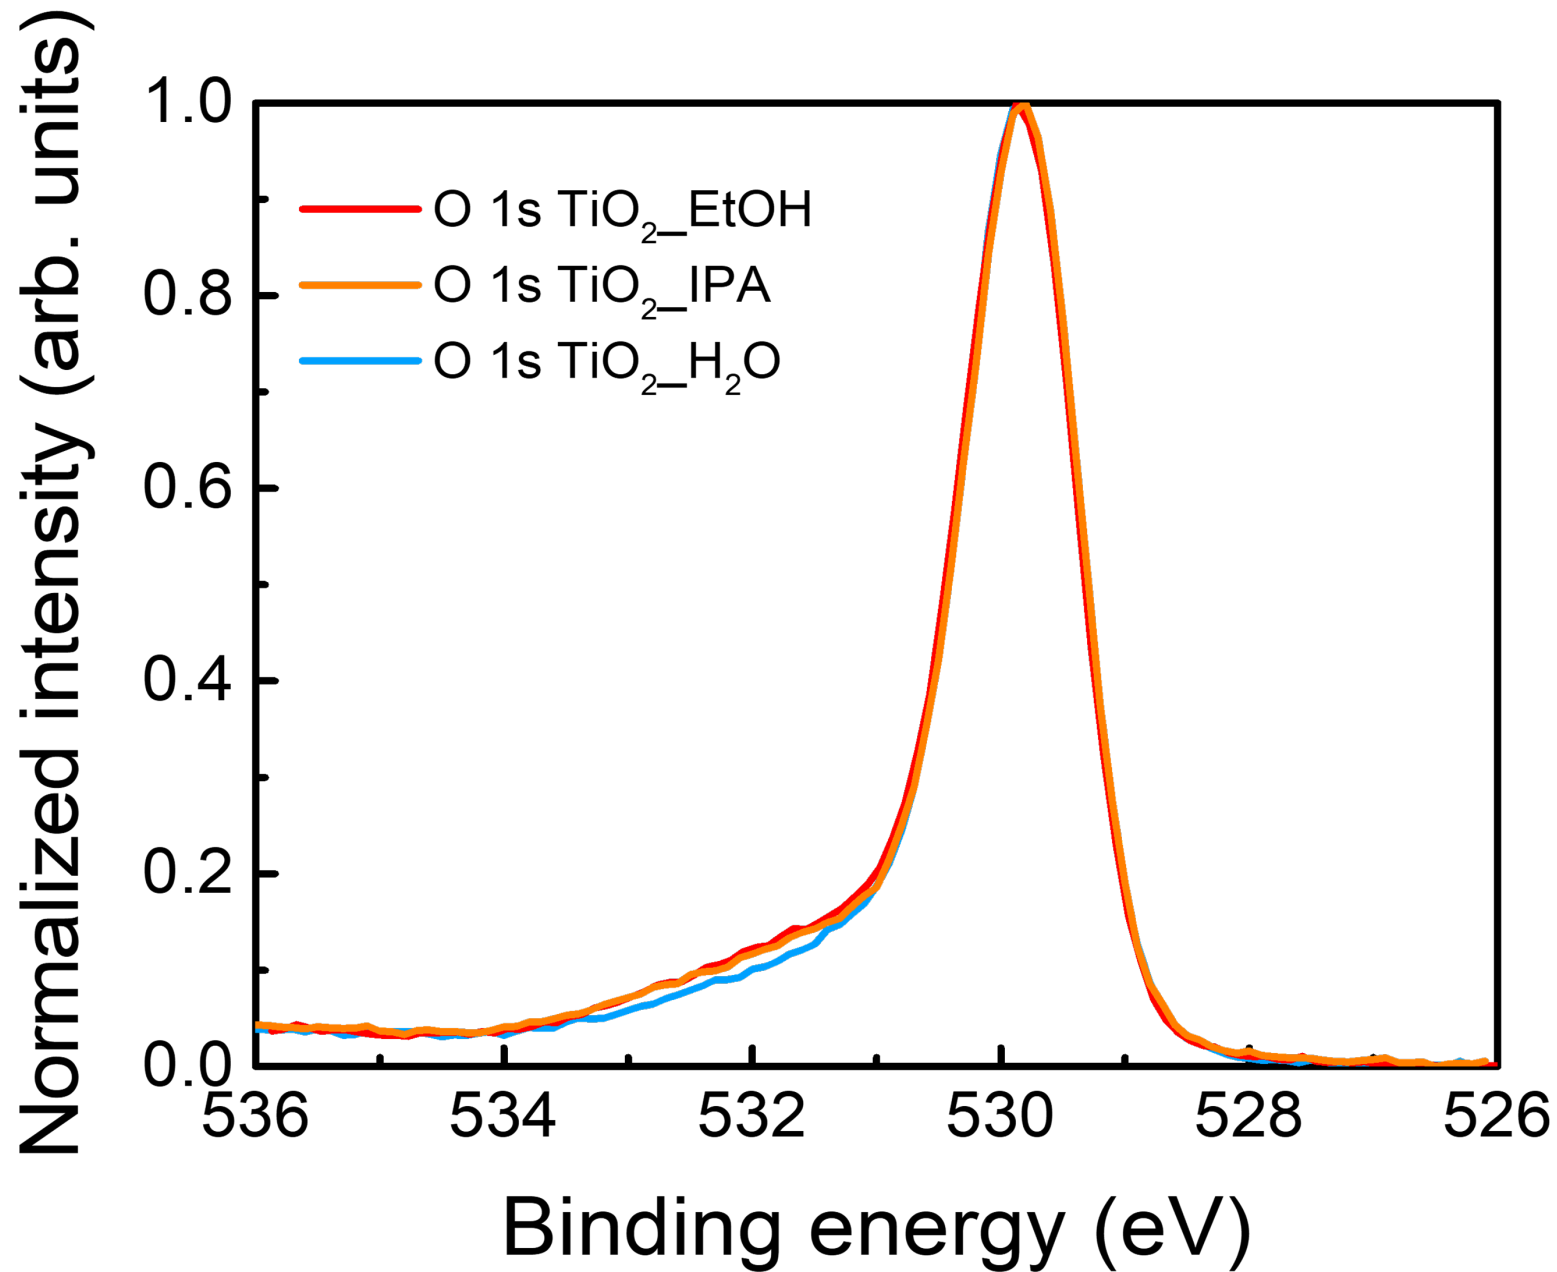

Supplement: d4va00110a5.pdf [file d4va00110a5.pdf]

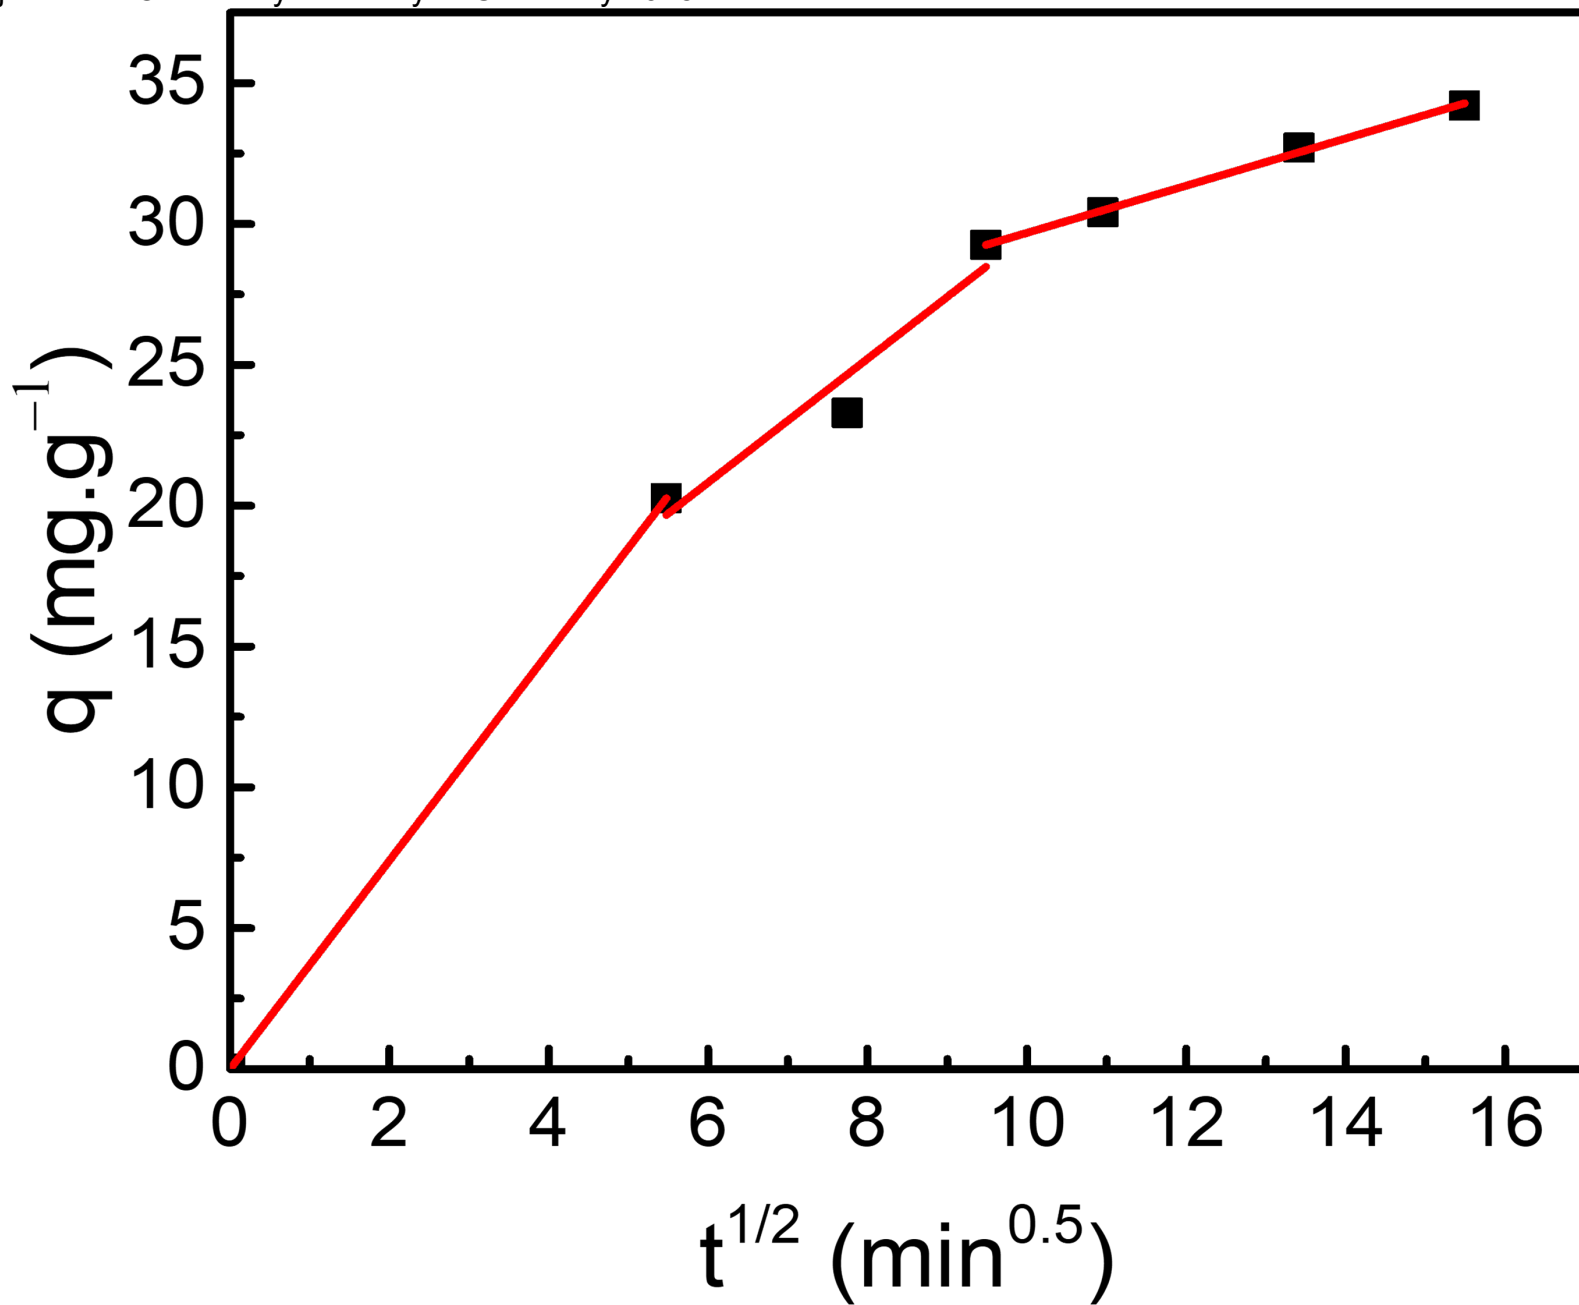

Supplement: d4va00110a6.pdf [file d4va00110a6.pdf]

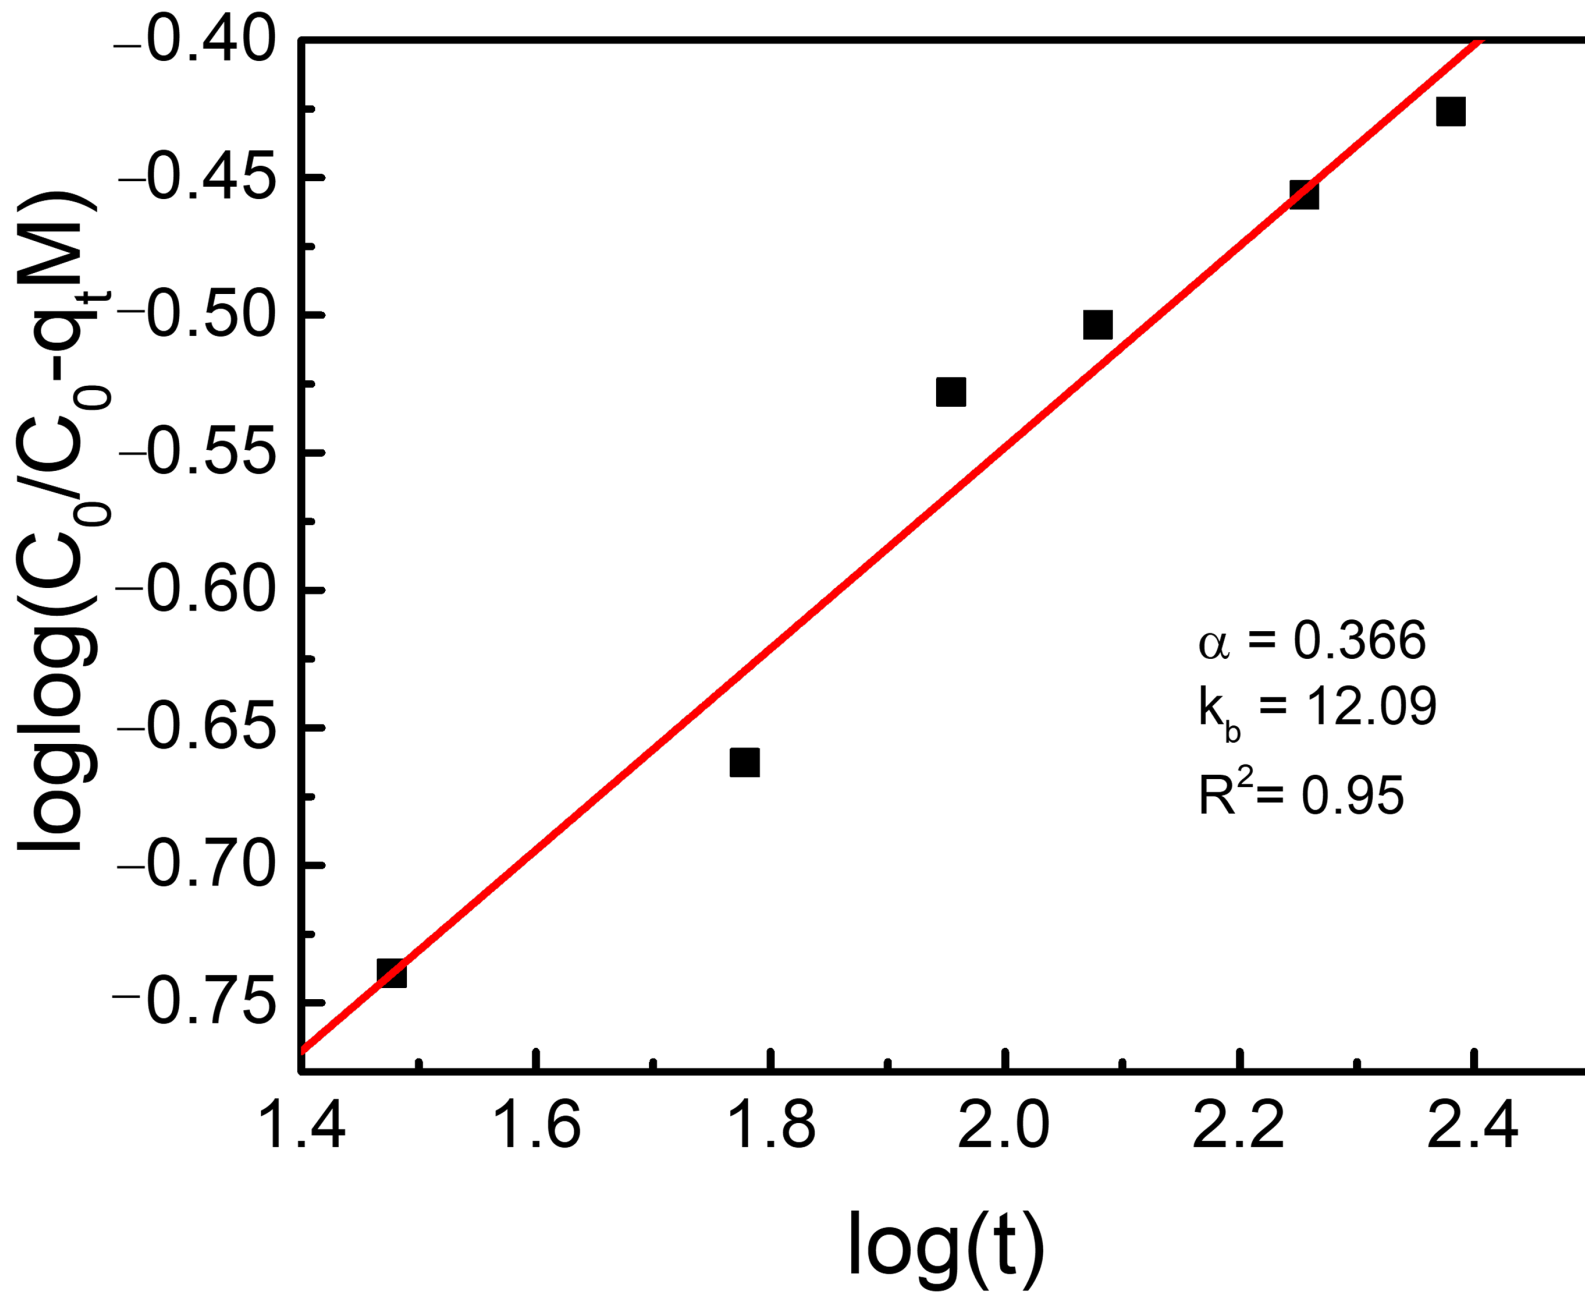

Supplement: d4va00110a7.pdf [file d4va00110a7.pdf]

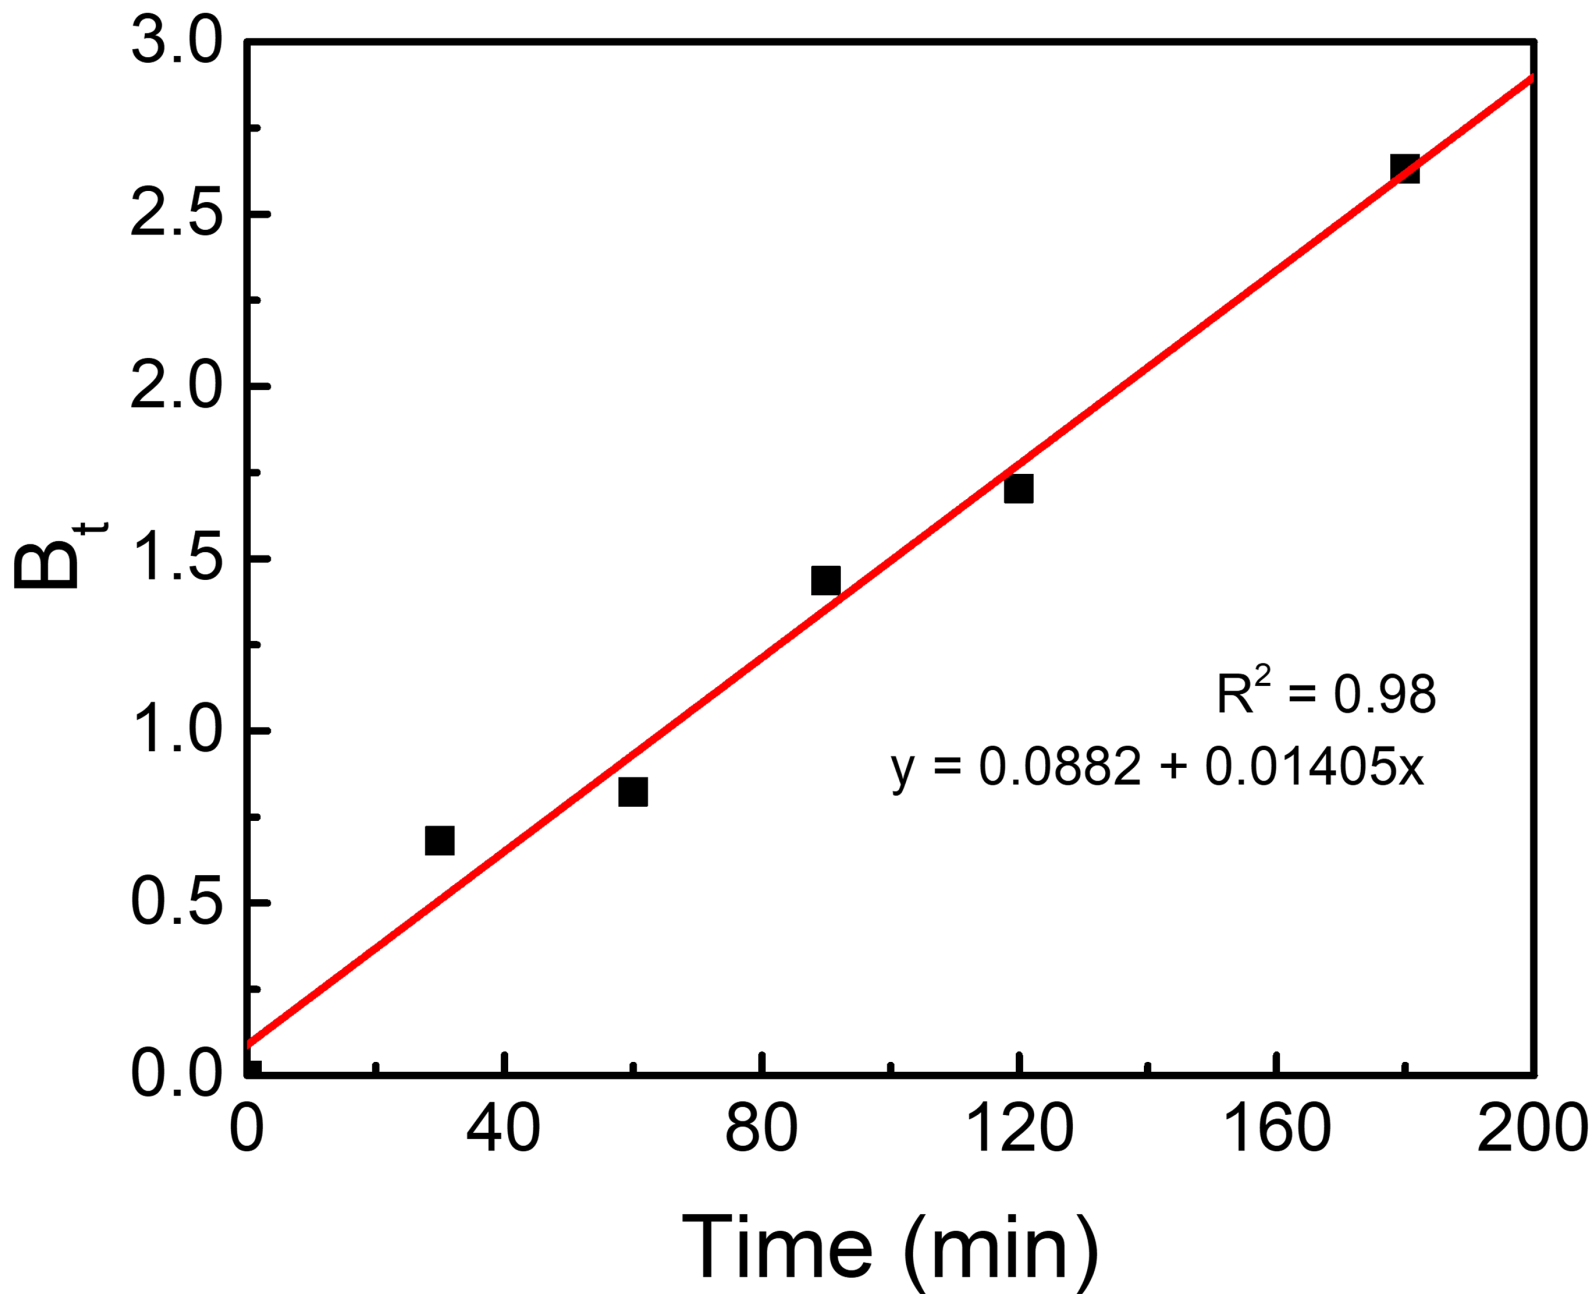

Supplement: d4va00110a8.pdf [file d4va00110a8.pdf]

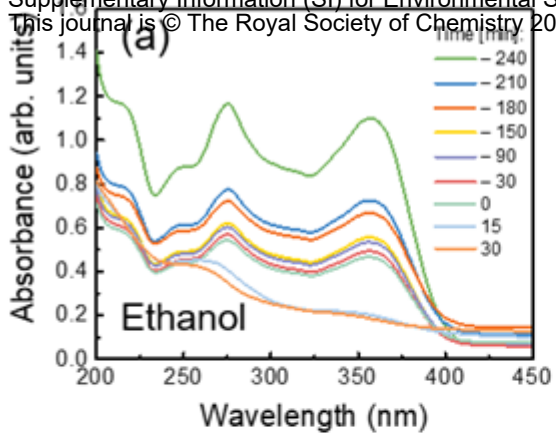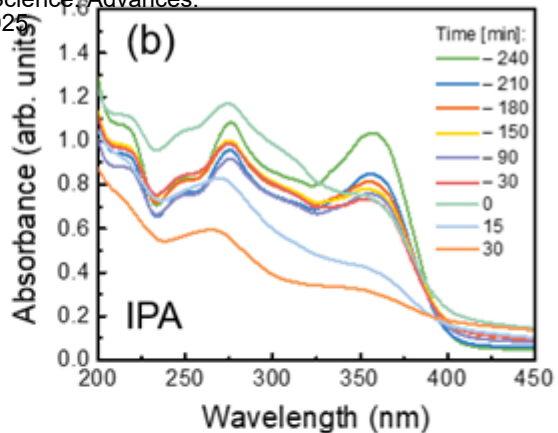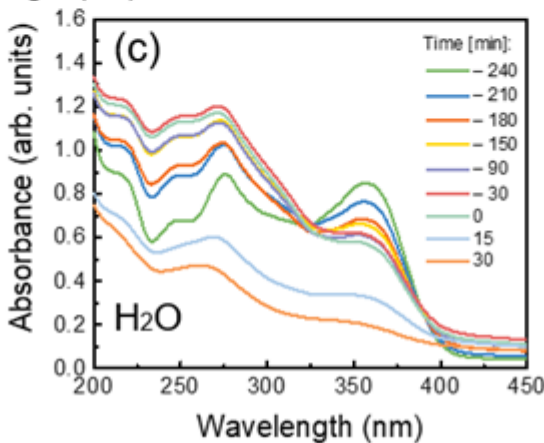

Supplement: d4va00110a9.pdf [file d4va00110a9.pdf]
